# Supplementary material
Source: Springer Nature journal article supplement (https://www.springermedizin.de/resource/supplementary/12943_2013_1479_MOESM2_ESM.pdf/9553110)

Vehicle

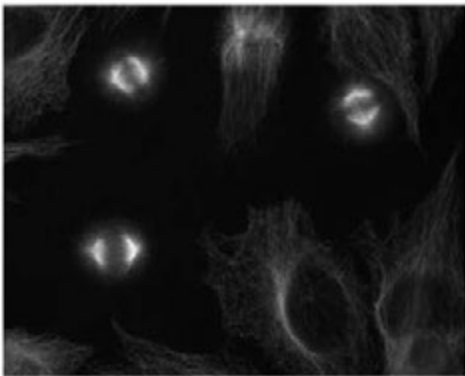

Paclitaxel

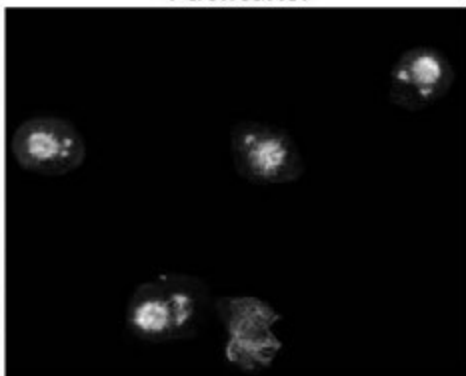

Taccalonolide A

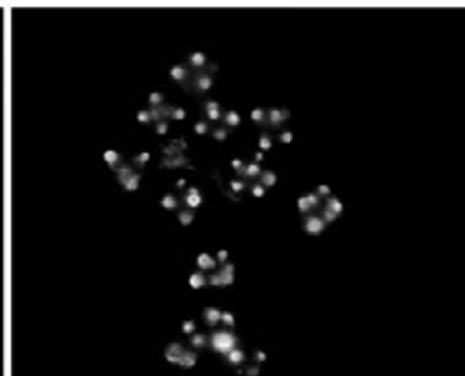

Taccalonolide AJ

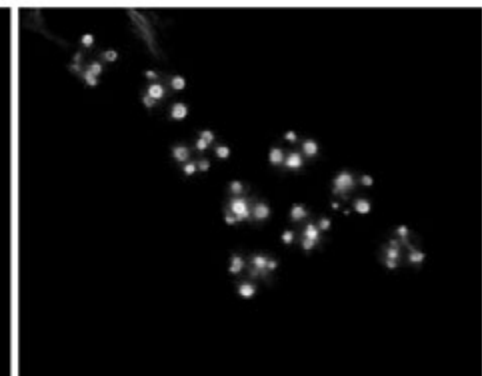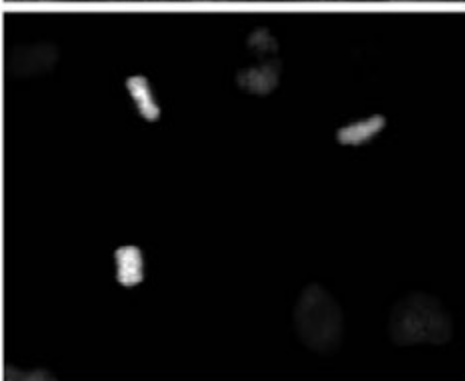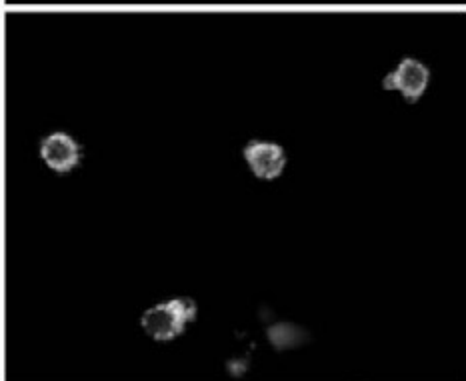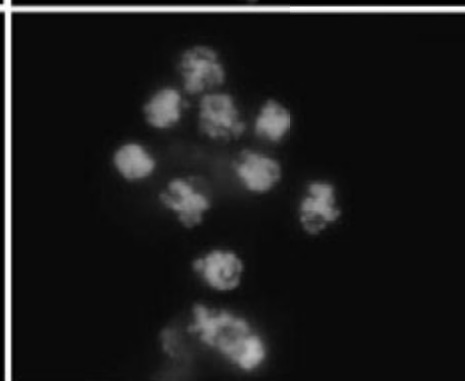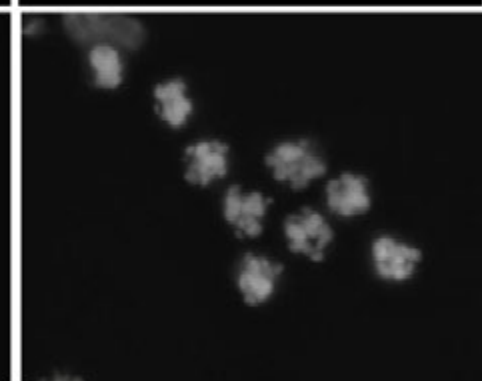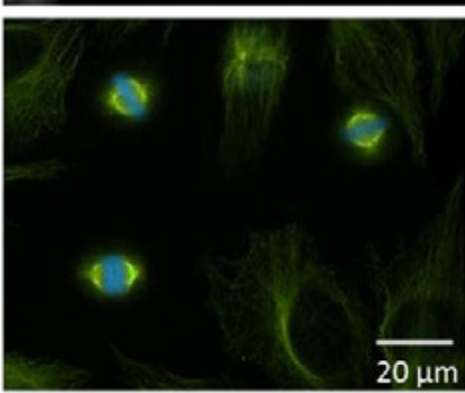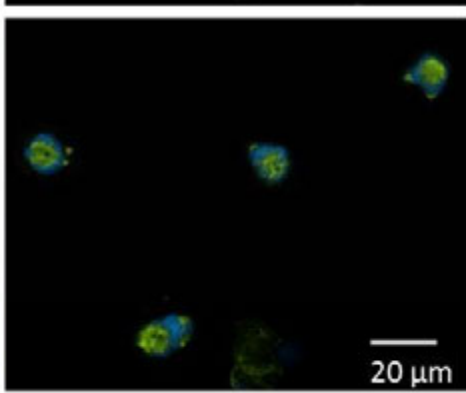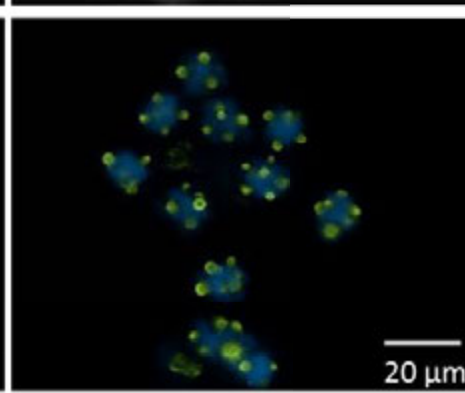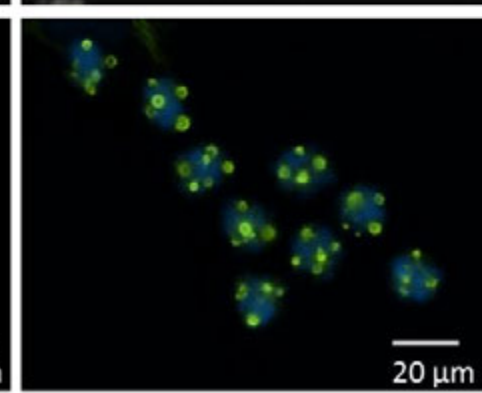

Supplement: MOESM2 [file 9553110]
